# Supplementary material for: A nitrogen and phosphorus enriched inorganic–organic hybrid material for electrochemical detection of selenium(iv) ions
Source: Royal Society of Chemistry journal article supplement (doi:10.1039/d5na00079c), 2025-01-01
Supplement: d5na00079c1.pdf [file d5na00079c1.pdf]

## Supplementary information

### **Nitrogen and Phosphorus Enriched Inorganic-Organic Hybrid Material for Electrochemical Detection of Selenium(IV) Ions**

*Arun Kumar<sup>ψ</sup>, Prakriti Thakur<sup>ψ</sup>, Nisha Dhiman, Sachin Balhara, and Paritosh Mohanty\**

*Functional Materials Laboratory, Department of Chemistry, Indian Institute of Technology  
(IIT) Roorkee, Roorkee, Uttarakhand-247667, India*

*\*Email: paritosh75@gmail.com, pm@cy.iitr.ac.in*

*<sup>ψ</sup>Both authors have equal contribution*

#### **1. Experimental details**

##### **1.1. Synthesis of HPHM**

The synthesis of HPHM was carried out as per our previous report [S1]. In the standard preparation of HPHM, 6 mmol (0.65 g) of DAP was dissolved in 10 mL of anhydrous DMSO in a Schlenk flask. A solution containing 1 mmol (0.35 g) of PNC (99% Sigma Aldrich, UK), dissolved in 10 mL of dry DMSO, was added gradually to the above solution under an argon atmosphere at 140 °C. The reaction mixture was then stirred for 18 hours. A product with a deep green color was acquired, which was filtered and rinsed with deionized water. The product was then dried at 80 °C for 12 h.

##### **1.2. Material characterization**

Fourier transform-infrared (FT-IR) (Spectrum Two, PerkinElmer) spectroscopy was employed to characterize the structure of the synthesized material (HPHM). FT-IR spectra were recorded using a KBr pellet in the range of 400 to 4000 cm<sup>-1</sup>. Furthermore, Wide-angle powder X-ray diffraction (XRD) analysis was carried out (XRD; Ultima IV; Rigaku) using Cu K $\alpha$  radiation ( $\lambda = 1.5405 \text{ \AA}$ ). The XRD data were obtained over a  $2\theta$  range of 10 to 80 degrees at a scanning

speed of 5° min<sup>-1</sup>. The textural properties were evaluated by using Autosorb iQ2 (Quantachrome Instruments, USA). The specimens were prepared for analysis by outgassing at 150 °C for five hours under vacuum conditions. Following this, the N<sub>2</sub> sorption isotherm was measured at a temperature of -196 °C and a pressure of 1 bar. The BET model was used to evaluate the specific surface area (S<sub>A</sub><sub>BET</sub>) within the pressure range of 0.05 to 0.30 (P/P<sub>0</sub>). The pore size distribution (PSD) was determined using the Density Functional Theory (DFT) method with the Kernel "N<sub>2</sub> at 77 K on carbon: Slit Pores, QSDFT equilibrium model." Additionally, the pore volume was obtained at a relative pressure of P/P<sub>0</sub> of 0.99. The FESEM image of the HPHM was recorded on Zeiss Ultra Plus (Carl Zeiss) with an operating voltage of 20kV. The TEM images were obtained using TECNAIG2S-TWIN microscope.

### 1.3. Electrochemical characterizations:

The anodic and cathodic peak current was increased linearly with the square root of scan rates ( $v^{1/2}$ ) from 5 to 100 mV s<sup>-1</sup>, which could be represented by the Randle-Sevick equation [S2] :

$$i = (2.69 \times 10^5) \times n^{\frac{3}{2}} \times A \times C \times D^{\frac{1}{2}} v^{\frac{1}{2}} \quad (s1)$$

Where, i = the anodic and cathodic peak current,

n = the number of transferred electrons,

A = electrode surface area (cm<sup>2</sup>)

C = concentration of the electroactive species (mol L<sup>-1</sup>),

D = diffusion coefficient of [Fe(CN)<sub>6</sub>]<sup>3-/4-</sup> (6.70×10<sup>-7</sup> cm<sup>2</sup> s<sup>-1</sup>) and

v = scan rates (V s<sup>-1</sup>)

After modifying the Randle-Sevick equation:

$$\frac{i}{v^{1/2}} = (2.69 \times 10^5) \times n^{\frac{3}{2}} \times A \times C \times D^{\frac{1}{2}} \quad (s2)$$

Where,  $\frac{i}{v^{1/2}}$  is the slope of the  $i_p$  linear fitting equation, the  $n$  is number of electrons is 1 for  $[\text{Fe}(\text{CN})_6]^{4-} \rightleftharpoons [\text{Fe}(\text{CN})_6]^{3-} + e^-$ . The above equation was used to calculate the electrochemical active surface area of the electrode material.

The diffusion coefficient is calculated by EIS using the following equation:

$$D = 0.5 \left( \frac{266.11}{\sigma_{\omega} \times C} \right)^2 \times 10^{-12} \quad (\text{s3})$$

Where  $D$  is diffusion coefficient in  $\text{cm}^2 \text{s}^{-1}$ ,  $\sigma_{\omega}$  is Warburg coefficient,  $C$  is the concentration in molar ( $\text{mol cm}^{-3}$ ).

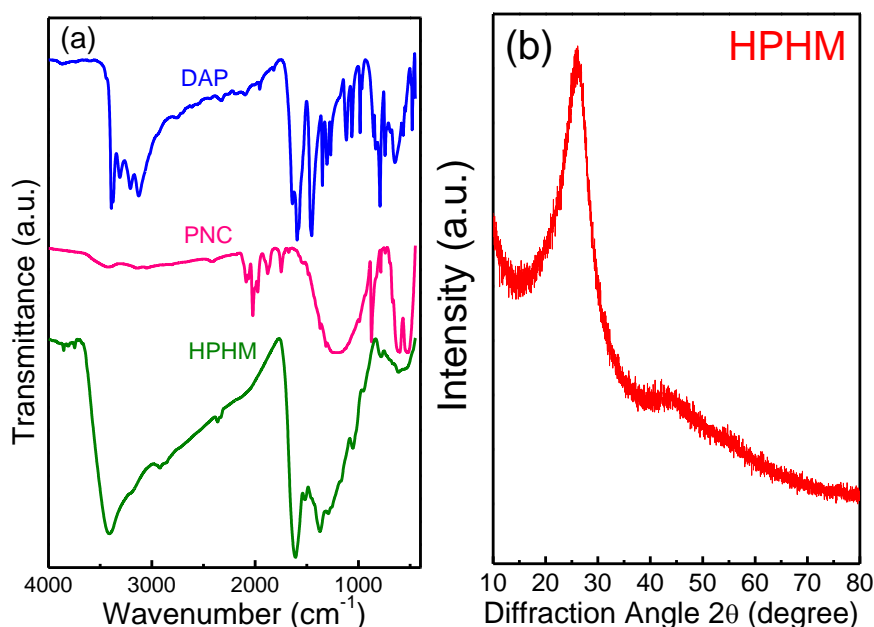

**Fig. S1.** (a) FT-IR spectra of DAP, PNC and HPHM and (b) XRD pattern of HPHM.

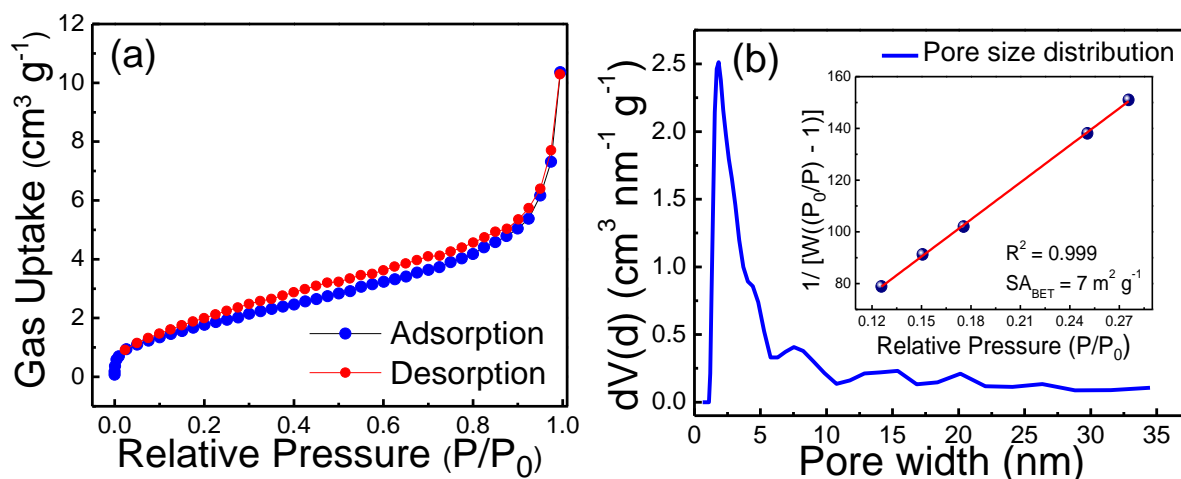

**Fig. S2.** (a) N<sub>2</sub> sorption isotherm of HPHM, and (b) pore size distribution (PSD) (inset: Multipoint BET plot) of HPHM.

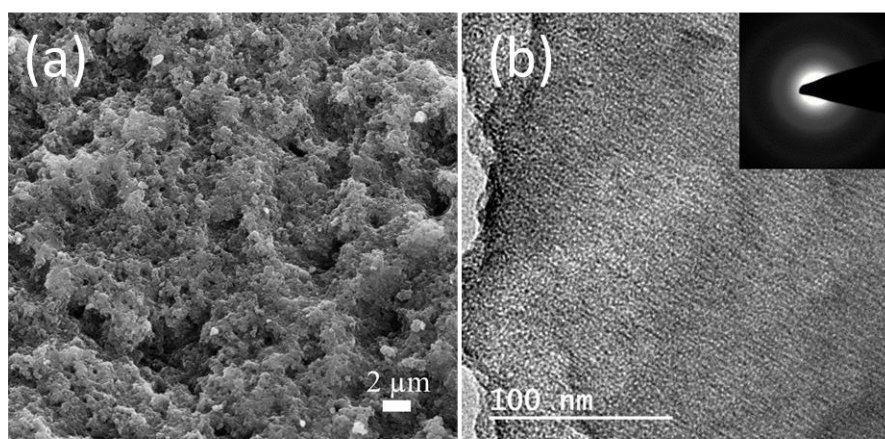

**Fig. S3.** (a) FESEM and (b) TEM (inset: SAED pattern) images of HPHM.

**Table S1.** Current response vs active mass loading of HPHM towards Se(IV) ions.

| S. No | Active mass loading (mg) | Current at the peak (mA) |
|-------|--------------------------|--------------------------|
| 1     | 2.2                      | 0.45                     |
| 2     | 2.9                      | 0.51                     |
| 3     | 3.6                      | 0.55                     |
| 4     | 4.1                      | 0.62                     |
| 5     | 4.5                      | 0.50                     |
| 6     | 5.1                      | 0.41                     |

73 **Table S2.** Current response vs deposition time for HPHM towards Se(IV) ions.

| S. No | Deposition time (s) | Current at the peak (mA) |
|-------|---------------------|--------------------------|
| 1     | 80                  | 0.54                     |
| 2     | 110                 | 0.55                     |
| 3     | 140                 | 0.56                     |
| 4     | 170                 | 0.60                     |
| 5     | 200                 | 0.59                     |
| 6     | 230                 | 0.57                     |

74

75

76

77 **Table S3.** Current response vs deposition potential for HPHM towards Se(IV) ions.

| S. No | Deposition potential (V) | Current at the peak (mA) |
|-------|--------------------------|--------------------------|
| 1     | -0.8                     | 0.57                     |
| 2     | -1.0                     | 0.58                     |
| 3     | -1.2                     | 0.63                     |
| 4     | -1.4                     | 0.59                     |
| 5     | -1.6                     | 0.58                     |

78

79

80

81

82

83

84

85

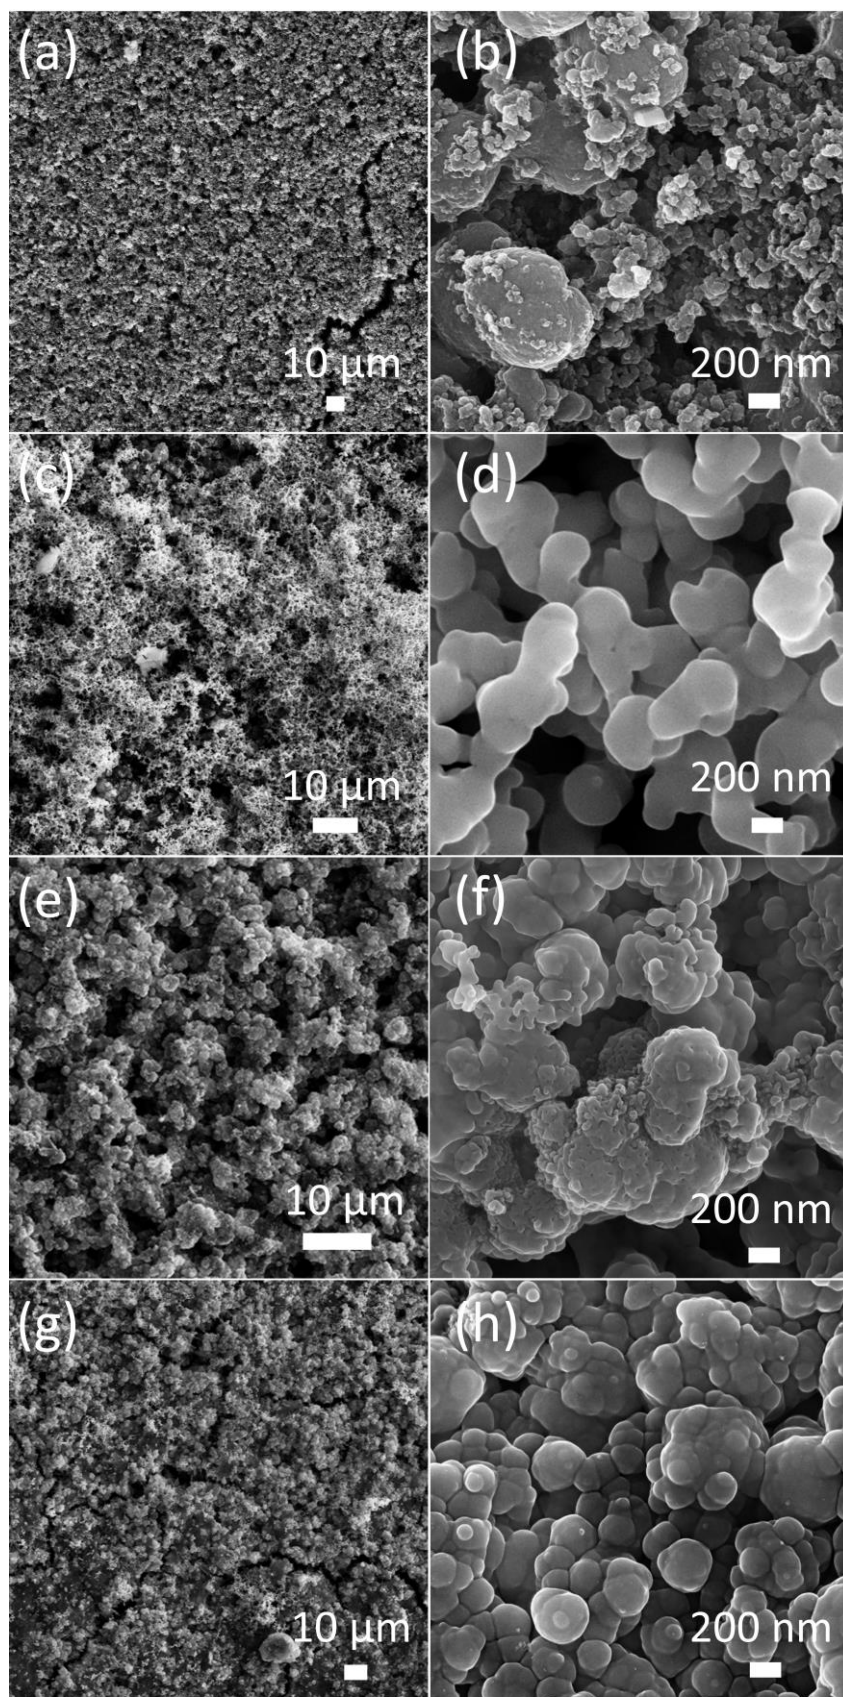

86

87 **Fig. S4.** FESEM image of (a-b) pristine electrode (before used), (c-d) after DT of 200 s , (e-

88 f) after DP -1.4 V, and (g-h) after 200 cycles at optimized conditions.

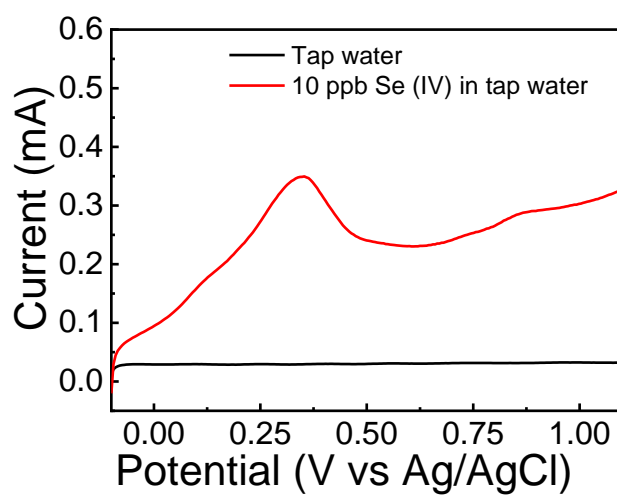

**Fig. S5.** DPV of tap water and 10 ppb solution of Se(IV) in tap water.

**Table S4.** Selected studies on the determination of inorganic selenium in water.

| S.N. | Electrode                                                                        | Methods | Potential Profile             |                          | Analytical Details |          | Ref.      |
|------|----------------------------------------------------------------------------------|---------|-------------------------------|--------------------------|--------------------|----------|-----------|
|      |                                                                                  |         | Deposition potential (DP) (V) | Deposition time (DT) (s) | LOD (ppb)          | LR (ppb) |           |
| 1    | HMDE                                                                             | LSCSV   | -0.35                         | 180                      | 4.73               | -        | S3        |
| 2    | HMDE                                                                             | DPCSV   | -1.05                         | 270                      | 16.23              | -        | S4        |
| 3    | Fe-Impregnated biochar from food waste                                           | -       | -                             | -                        | 3.2                | -        | S5        |
| 4    | MFE/Ag                                                                           | DPCSV   | -0.25                         | 45                       | 17                 | 0.04-8   | S6        |
| 5    | Au/BDD                                                                           | ASV     | -0.4                          | 120                      | 10                 | 10-100   | S7        |
| 6    | Graphite SPEs                                                                    | ASV     | -0.6                          | 300                      | 4.9                | 10-1000  | S8        |
| 7    | Screen print graphite electrode                                                  | -       | -                             | -                        | 19.2               | 10-1000  | S9        |
| 8    | Gold, modified Boron doped diamond electrode                                     | -       | -                             | -                        | 20                 | -        | S10       |
| 9    | SiO <sub>2</sub> (NPs) grafted with 3-(2-aminoethylamino) propyltrimethoxysilane | -       | -                             | -                        | 11.33              | 15-100   | S11       |
| 10   | Au/ZnO/ITO                                                                       | SWASV   | 0.6 V                         | -                        | 2.89               | 5-100    | S12       |
| 11   | HPHM fabricated on graphite sheet                                                | DPV     | -1.2 V                        | 170                      | 2.18               | 5-50     | This work |

*LSCSV: ; DPCSV: Differential pulse cathodic stripping voltammetry; ASV: Anodic stripping voltammetry; SWASV: Square wave anodic stripping voltammetry; DPV: Differential pulse voltammetry; LOD: Limit of detection; LR: Linear range.*



119    **Reference**

- 120    [S1] N. Dhiman, P. Mohanty, *New J. Chem.*, 2019, **43**, 16670-16675.
- 121    [S2] A. J. Bard, L. R. Faulkner, *Electrochemical Methods: Fundamentals and Applications*,  
122        (2000), 2nd edition. Wiley Global Education.
- 123    [S3] G. Mattsson, L. Nyholm, Å. Olin, *J. Electroanal. Chem.*, 1994, **379**, 49-61.
- 124    [S4] C. Locatelli, G. Torsi, *J. Electroanal. Chem.*, 2001, **509**, 80-89.
- 125    [S5] S. -H. Hong, F. N. Lyonga, J.-Kyu, Kang, E. -J. Seo, C. -G. Lee, S. Jeong, S. -G. Hong,  
126        S. -J. Park, *Chemosphere*, 2020, **252**, 126475.
- 127    [S6] T. B. Rubinskaya, S. V. Kovaleva, E. M. Kulagen, V. P. Gladysheva, *J. Anal. Chem.*, 2003,  
128        **58**, 165-170.
- 129    [S7] C. F. Pereira, F. B. Gonzaga, A. M. Guarita-Santos, J. R. SouzaDe, *Talanta*, 2006, **69**,  
130        877-881.
- 131    [S8] N. Y. Stozhko, E. I. Morosanova, L. I. Kolyadina, S. V. Fomina, *J. Anal. Chem.*, 2006,  
132        **61**, 158-165.
- 133    [S9] A. V. Kolliopoulos, J. P. Metters, C. E. Banks, *Anal. Methods*, 2013, **5**, 851-856.
- 134    [S10] T. A. Ivandini, Y. Einaga, *Electrocatalysis*, 2013, **4**, 36-374.
- 135    [S11] C. Shi, G. S. Ding, A. N. Tang, Y. Y. Qiao, *Anal. Methods*, 2017, **9**, 1658-1664.
- 136    [S12] R. Jain, A. Thakur, P. Kumar, J. Pooja, *Electrochim. Acta*, 2018, **290**, 291-302.
